# Supplementary material
Source: PubMed Central journal article supplement (PMC3528540)
Supplement: 1209565109_pnas.201209565SI.pdf [file 1209565109_pnas.201209565SI.pdf]

# Supporting Information

Bepperling et al. 10.1073/pnas.1209565109

## SI Materials and Methods

**Preparation of Genomic DNA from *Deinococcus radiodurans*.** Cells were grown in 100 mL TGY (1% bactotryptone, 0.5% yeast extract, and 0.1% glucose) for 72 h at 30 °C, harvested by centrifugation (5 min, 4,000 × g), washed with 1 mL water and 1 mL ethanol, and incubated in 400 μL TE [10 mM Tris-HCl (pH 8.0), 1 mM EDTA] containing 50 μg lysozyme for 30 min at 25 °C. Phenol/chloroform/isoamylalcohol (25:24:1; 800 μL) were added, and after centrifugation (2 min, 13,000 × g), the supernatant was transferred to a new tube. This step was repeated. The resulting supernatant was precipitated with 100% ethanol and centrifuged (10 min, 13,000 × g). The pellet was washed with 70% (vol/vol) ethanol, dried, and resuspended in 200 μL TE.

**Expression and Purification of sHsps.** For purification of heat shock protein (Hsp) 17.7 and Hsp20.2, N-terminal SUMO (small ubiquitin-like modifier) fusions were constructed. SUMO (1-98) was amplified from yeast genomic DNA and cloned via NdeI and BamHI into pET28b (Invitrogen), resulting in an N-terminal His<sub>6</sub>-tag. The hsp17.7 and hsp20.2 genes were amplified by PCR and cloned via BamHI and XhoI into pET28b behind the SUMO gene. *Escherichia coli* BL21 cells carrying the respective plasmid were cultured in LB media at 37 °C until an OD<sub>600</sub> of 0.7 was reached. Expression was induced with 1 mM isopropyl-beta-D-thio-galactopyranoside (IPTG), and the cells were harvested after another 4 h by centrifugation (10 min, 5,000 × g). The pellet was resuspended in buffer A [40 mM sodium phosphate (pH 7.4), 300 mM NaCl, 40 mM imidazole] and lysed using a cell disruptor (BasicZ; Constant Systems). The small Hsps (sHsps) were purified from the resulting lysate by Ni<sup>2+</sup>-chelating chromatography (GE Healthcare). The proteins were dialyzed against buffer A and cleaved with the His-tagged SUMO protease ubiquitin-like protease 1. The solution was applied to Ni<sup>2+</sup>-chelating chromatography again, and the flow through was further purified on a 16/60 Sephacryl 300 HR gel filtration column (GE Healthcare) equilibrated in TE-50 [50 mM Tris-HCl (pH 7.4), 2 mM EDTA]. sHsp-containing fractions were pooled, flash-frozen in liquid nitrogen, and stored at -80 °C.

**Preparation of Cell Lysates.** *D. radiodurans* was grown in 2 × 50 mL TGY (1% bactotryptone, 0.5% yeast extract, and 0.1% glucose) for 72 h at 30 °C. The cells were resuspended in PBS containing 5 mM EDTA and protease inhibitors (Mix G; Serva) and lysed using a Retsch MM400 mixer mill.

**Native PAGE.** Proteins were separated by Native PAGE using 4–12% (vol/vol) Tris-Glycin precast gradient gels (Serva) according to the supplier's instructions. The Native Mark molecular weight standard (Invitrogen) was used for size determination.

**Immunoblotting and Immunoprecipitation.** Proteins were separated by SDS/PAGE and transferred to nitrocellulose membranes. The immunodetection was performed using polyclonal rabbit antiserum raised against purified Hsp17.7 or Hsp20.2 (Pineda). For detection, a horseradish peroxidase-linked secondary conjugate (Sigma) was used, and reactive bands were visualized by enhanced chemiluminescence (ECL-Plus) detection reagents (GE Healthcare).

For immunoprecipitation (IP), 200 μg of total protein of freshly prepared *D. radiodurans* lysates were incubated with 10 μg of purified sHsp for 30 min at 43 °C. Ten microliters of polyclonal rabbit antiserum was added subsequently, and the samples were incubated for 30 min at 20 °C and a further 30 min on ice. Twenty

microliters of 50% (wt/vol) Protein G Sepharose slurry pre-equilibrated in IP buffer [25 mM Tris-HCl, 150 mM NaCl, 1 mM EDTA, 1% Nonidet P-40, and 5% (vol/vol) glycerol, pH 7.4] was added, and the samples were further incubated with agitation for 60 min on ice. The protein G Sepharose with attached complexes was sedimented by centrifugation (1 min, 500 × g) and washed four times with 500 μL IP buffer until no unspecific binding proteins were detected in these washing fractions. Complexed proteins were eluted using 50 μL Pierce Co-Immunoprecipitation Elution Buffer (pH 2.8, including primary amines) or SDS/PAGE loading buffer. Ten microliters of the eluate was separated by SDS/PAGE.

**In Vivo Complementation Experiments.** *D. radiodurans* sHsps were cloned into a modified pBad22 vector via NdeI and XbaI restriction sites. The overexpression plasmid for *ibpA/B* (pUHE21) and the *ibpA/B* knockout strain (MC4100) was a kind gift of A. Mogk (University of Heidelberg, Heidelberg, Germany). For comparison of final OD<sub>600</sub> values, 3 mL cultures with and without 1 mM IPTG and 0.1% L-arabinose were inoculated with cells from stationary-phase liquid cultures and grown for 20 h at 37 °C. Cell suspensions were diluted 1:10 for recording of final OD<sub>600</sub> values.

Isolation of aggregated protein was generally carried out as described elsewhere (1). Briefly, overnight cultures of *E. coli* were diluted to a final OD<sub>600</sub> of 0.1 in LB media supplemented with 1 mM IPTG and 0.1% L-arabinose and were grown at 30 °C until they reached mid-exponential growth phase. Heat shock was carried out in a water bath (Julabo) at 46 °C for 30 min. Cells were cooled to 30 °C and recovered for 15 min at 30 °C. Afterward, cells were cooled rapidly in ice water, and 50 mL of the culture were harvested (10 min, 3,000 × g at 4 °C). Cells were resuspended according to their OD<sub>600</sub> (1 mL of OD<sub>600</sub> = 1 in 5 μL) in ice-cold buffer A [10 mM potassium phosphate (pH 6.5), 1 mM EDTA, 20% (wt/vol) sucrose, and 1 mg/mL lysozyme] and left on ice for 30 min. For cell lysis 100 μL of resuspended cells were diluted 1:10 into buffer B [10 mM potassium phosphate (pH 6.5) and 1 mM EDTA] and sonicated for 5 min. After removal of cell fragments, aggregated protein was pelleted and frozen in liquid nitrogen. Resuspended pellets were washed once with buffer B and twice with buffer B with 2% (vol/vol) Nonidet P-40 to remove lipids from the pellet. Finally aggregated proteins were resuspended and incubated for 5 min at 95 °C in SDS/PAGE loading buffer before separation by SDS/PAGE.

**Analytical Ultracentrifugation.** Sedimentation velocity experiments (SV-AUC) were carried out with a ProteomLab XL-I (Beckman) equipped with absorbance and interference optics. Four hundred microliters of the samples and 410 μL of the phosphate buffer were loaded into assembled cells with quartz windows and 12-mm path length charcoal-filled epon double sector centerpieces and were centrifuged at 42,000 rpm using an AN Ti-60 rotor (Beckman) for Hsp17.7 samples and an AN Ti-50 rotor for Hsp20.2 samples. The signal at 280 nm or 230 nm was monitored and one replicate was taken. Data analysis was carried out with the Ultrascan and the USLIMS platform (2). In brief, after 2D grid analysis and a Monte Carlo simulation (50 iterations), the data fit was further refined by a genetic algorithm and finally tested for robustness by another Monte Carlo simulation (50 iterations). Alternatively, the data were analyzed using the continuous c(S) distribution mode of sedfit (3, 4).

The multisignal ck(S) distribution was calculated with the multi-wavelength discrete/continuous distribution analysis of SEDPHAT

(5, 6) using an extinction coefficient of  $4,470 \text{ M}^{-1}\cdot\text{cm}^{-1}$  for Hsp20.2 and  $38,000 \text{ M}^{-1}\cdot\text{cm}^{-1}$  for lysozyme and a refractive index increment of  $55,550 \text{ M}^{-1}\cdot\text{cm}^{-1}$  for Hsp20.2 and  $46,750 \text{ M}^{-1}\cdot\text{cm}^{-1}$  for lysozyme, respectively.

For analysis of substrate complexes, Hsp17.7 was labeled with Alexa 488 succinimidylester (Invitrogen) according to the manufacturer's protocol, and sedimentation was monitored in a ProteomLab XL-A (Beckman) ultracentrifuge equipped with a fluorescence detection system (AVIV Biomedical). For substrate binding analysis,  $10 \mu\text{M}$  lysozyme in  $100 \text{ nM}$  sodium phosphate (pH 7.4) and  $50 \text{ mM}$  NaCl were incubated with increasing Hsp20.2 concentrations ranging from 0 to  $40 \mu\text{M}$  Hsp20.2 in the presence of  $1 \text{ mM}$  Tris(2-carboxyethyl)phosphine (TCEP) for 1 h and subjected to analytical ultracentrifugation sedimentation velocity runs.

**CD Spectroscopy.** CD spectra were recorded using a Jasco J-715 spectropolarimeter with a PTC 343 peltier unit. The experiments were carried out in quartz cuvettes with  $0.1\text{-cm}$  path length. Thermal transitions were monitored at a constant wavelength of  $220 \text{ nm}$  with a heating rate of  $20 \text{ }^\circ\text{C}$  per hour. Data were normalized by setting the signal of the unfolded protein to 1.

**Protein Crystallization and Structure Determination.** Crystals of Hsp17.7 were grown at  $20 \text{ }^\circ\text{C}$  within 5 mo to their final size of  $110 \times 80 \times 70 \mu\text{m}^3$  by using the sitting drop vapor diffusion method. The drops contained equal volumes of protein ( $12 \text{ mg/mL}$ ) and reservoir solution [ $0.2 \text{ M}$  ammoniumacetate,  $0.1 \text{ M}$  bis-Tris (pH 6.5), and  $25\%$  (wt/vol) PEG 3350]. Before exposure to X-rays, crystals were soaked in reservoir solution for 30 s and subsequently frozen in a stream of cold nitrogen gas at  $100 \text{ K}$ . A native dataset was collected on a Bruker Microstar/X8 Proteum (Bruker AXS) with a Cu rotating anode ( $\lambda = 1.54 \text{ \AA}$ ) and processed with the Proteum software suite (Bruker AXS). Hsp17.7 crystallized in the trigonal space group P3121 with cell parameters of  $a, b = 51.3 \text{ \AA}$ ,  $c = 80.5 \text{ \AA}$ .

For structure determination, molecular replacement was performed in Phaser (7) using the coordinates of HspA from *Xanthomonas sp.* (XAC1151; Protein Data Bank ID code 3GLA) as a starting model. The crystal structure of Hsp17.7 was completed in successive rounds with the interactive 3D graphic program MAIN (8). The model was refined with restraints between bonded atoms and between noncrystallographic symmetry-related atoms using TLS parameters and REFMAC5 (9), which yielded current crystallographic values of  $R_{\text{cryst}} = 0.197$  and  $R_{\text{free}} = 0.253$ . Coordinates were confirmed to have good stereochemistry from the Ramachandran plot, with  $96\%$  of residues in the most favored region and  $4\%$  of residues in the additionally allowed regions (Table S1). The asymmetric unit contains one subunit and 79 water molecules. The N-terminal 45 and the last 19 C-terminal amino acids are structurally disordered.

**Mass Spectrometry and Bioinformatics.** Commassie-stained lanes were sliced into four parts and treated as individual samples. Proteins were reduced, alkylated, and digested overnight with trypsin as described previously (10). Peptides were extracted in five steps by adding sequentially  $200 \mu\text{L}$  of buffer A (water with  $0.1\%$  formic acid), acetonitrile (ACN), buffer A, ACN, ACN respectively. After each step, samples were treated for 15 min

by sonication. After steps 2, 4, and 5 the supernatant was removed from the gel slices and collected for further processing.

The collected supernatants were pooled, concentrated in a speed vac (DNA120; Thermo Scientific) to  $\sim 20 \mu\text{L}$  end volume and filtered through a  $0.22\text{-}\mu\text{m}$  centrifuge filter (Millipore). Peptides were loaded onto an Acclaim PepMap RSLC C18 trap column (Thermo Scientific) with  $5 \mu\text{L}/\text{min}$  and separated on a PepMap RSLC C18 column ( $75 \mu\text{m} \times 150 \text{ mm}$ , C18,  $2 \mu\text{m}$ ,  $100 \text{ \AA}$ ; Thermo Scientific) at a flow rate of  $0.2 \mu\text{L}/\text{min}$ . A linear gradient from  $5\%$  (vol/vol) to  $35\%$  (vol/vol) buffer B ( $100\%$  acetonitrile with  $0.1\%$  formic acid) eluted the peptides in 60 min to an LTQ Orbitrap XL (Thermo Scientific). Full scans and five dependent  $\text{MS}^2$  scans (6 collision-induced dissociation or 3 collision-induced dissociation and 2 higher-energy C-trap dissociation spectra) were recorded in each cycle.

The mass spectrometry data derived from each gel slice were searched against a *D. radiodurans* database containing 3,167 proteins downloaded from the National Center for Biotechnology Information (14.07.2011) using the SEQUEST algorithm implemented into the software "Proteome Discoverer 1.3" (Thermo Scientific). The search was limited to tryptic peptides containing a maximum of two missed cleavage sites, monoisotopic precursor ions, and a peptide tolerance of  $10 \text{ ppm}$  for precursors and  $0.5 \text{ Da}$  for fragment masses. Proteins were identified with two distinct peptides with a target false discovery rate for peptides below  $1\%$  according to the decoy search. Proteins also detected in control experiments using rabbit preimmune-sera in the IP reaction were manually removed.

**Electron Microscopy and Image Processing.** For negative stain electron microscopy,  $5 \mu\text{L}$  of the protein sample ( $0.05 \text{ mg/mL}$  protein in  $50 \text{ mM}$  Hepes/KOH,  $75 \text{ mM}$  NaCl, pH 7.4) were adsorbed for 2 min onto carbon-coated grids that were glow discharged in air. Excess solution was blotted off, and the samples were negatively stained for 30 s using uranyl acetate [ $1.5\%$  (wt/vol) at pH 4.5]. Electron micrographs were recorded at a calibrated magnification of 58,000 and at defocus values of  $400\text{--}1,000 \text{ nm}$  using a JEOL JEM 100CX electron microscope operated at  $100 \text{ kV}$ . Suitable micrographs were digitized at a step size of  $8.5 \mu\text{m}$  using a Flex-Tight X5 array scanner, resulting in a pixel size of  $1.46 \text{ \AA}$  at the specimen level.

Well-separated single particle images on electron micrographs were semiautomatically selected using Boxer from the Eman software package (11), which was also used for the determination of the defoci and the correction of contrast transfer function (CTF) by phase flipping. The following image processing procedures were carried out using the Imagic suite (12). In a first step, CTF-corrected molecular images from several micrographs were pooled, band-pass filtered between  $10$  and  $170 \text{ \AA}$ , and normalized. Translational alignment was performed by mass centering. Upon multivariate statistical analysis, class averaging has been performed. For an estimation of the oligomeric size distributions, the circumscribing diameters of all class averages for each sample have been measured.

**Multiple Sequence Alignment.** Multiple alignments of sequences have been calculated using the CLUSTAL Web server and default parameters. The alignment of the Hsp17.7  $\beta 10$ -strand was improved manually on the basis of the crystal structure.

1. Tomoyasu T, Mogk A, Langen H, Goloubinoff P, Bukau B (2001) Genetic dissection of the roles of chaperones and proteases in protein folding and degradation in the *Escherichia coli* cytosol. *Mol Microbiol* 40(2):397–413.
2. Brookes E, Cao W, Demeler B (2010) A two-dimensional spectrum analysis for sedimentation velocity experiments of mixtures with heterogeneity in molecular weight and shape. *Eur Biophys J* 39(3):405–414.
3. Schuck P (2000) Size-distribution analysis of macromolecules by sedimentation velocity ultracentrifugation and lamm equation modeling. *Biophys J* 78(3):1606–1619.

4. Schuck P, Perugini MA, Gonzales NR, Howlett GJ, Schubert D (2002) Size-distribution analysis of proteins by analytical ultracentrifugation: Strategies and application to model systems. *Biophys J* 82(2):1096–1111.
5. Balbo A, et al. (2005) Studying multiprotein complexes by multisignal sedimentation velocity analytical ultracentrifugation. *Proc Natl Acad Sci USA* 102(1):81–86.
6. Padrick SB, et al. (2010) Determination of protein complex stoichiometry through multisignal sedimentation velocity experiments. *Anal Biochem* 407(1):89–103.
7. McCoy AJ, et al. (2007) Phaser crystallographic software. *J Appl Cryst* 40(Pt 4): 658–674.



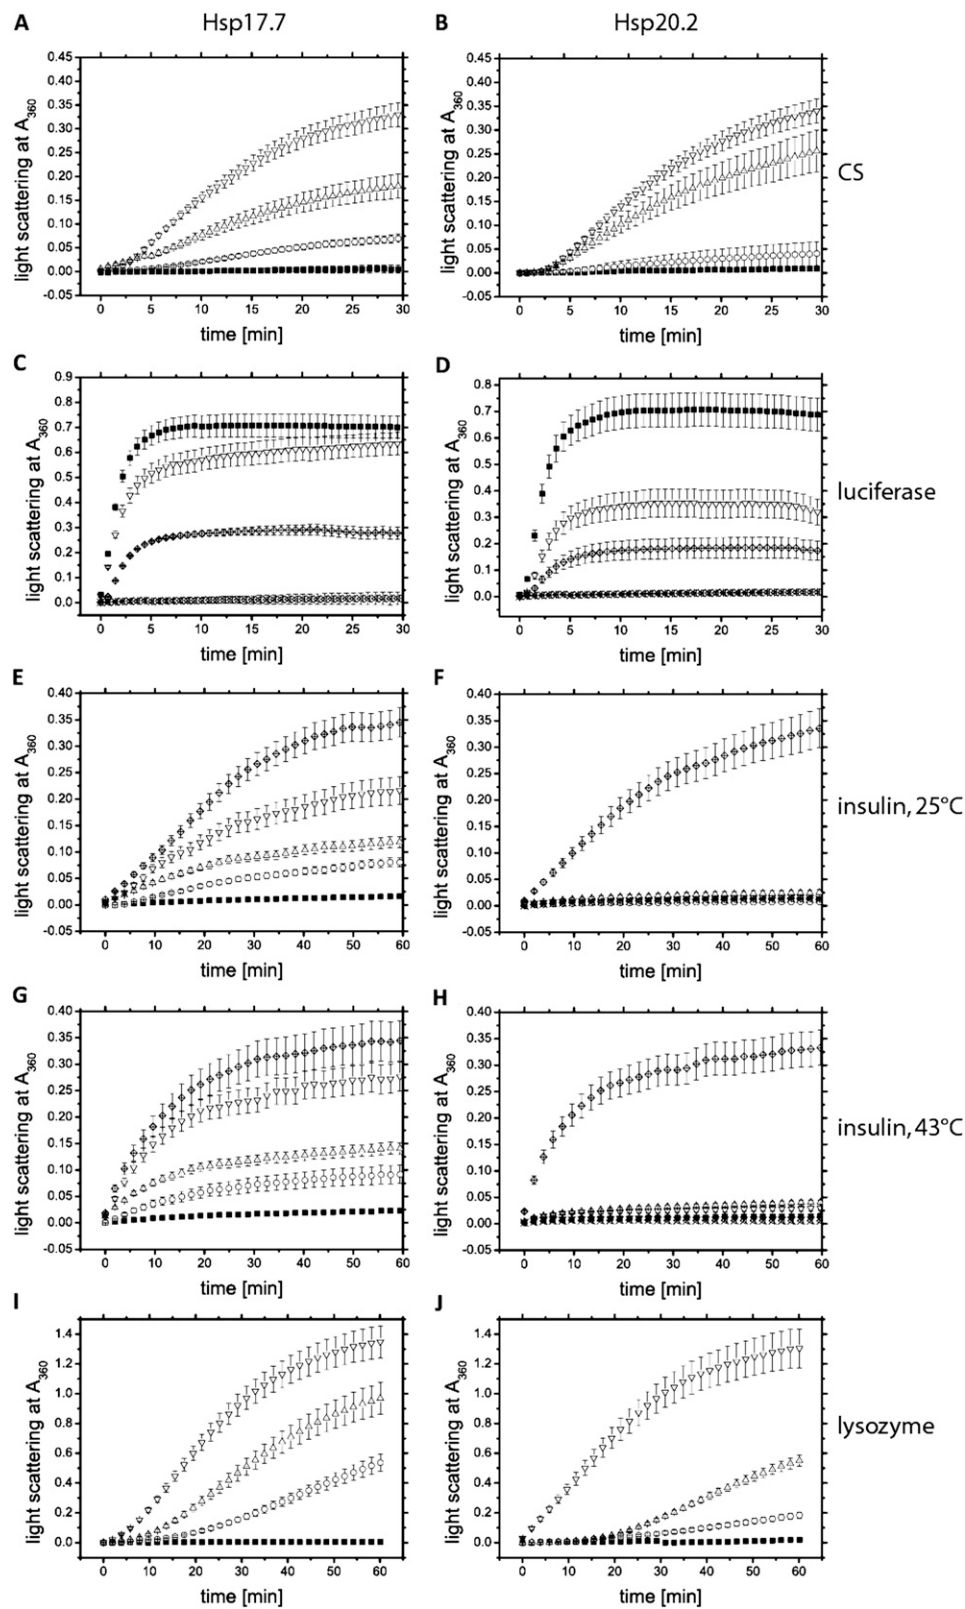

**Fig. S2.** Chaperone activity of Hsp17.7 and Hsp20.2. Chaperone function was assessed by the ability to suppress the aggregation of CS, luciferase, insulin, and lysozyme. The kinetic of aggregation was determined after the light scattering of the samples at 360 nm. All assays were performed in triplicates, and mean values and the respective SDs (error bars) are indicated. (A) Influence of Hsp17.7 on the thermal aggregation of CS. CS (final concentration: 150 nM monomer) was diluted into a thermostated solution (43 °C) of 300 nM ( $\Delta$ ), 600 nM ( $\circ$ ), and 3  $\mu$ M ( $\blacksquare$ ) Hsp17.7 monomer.  $\nabla$  represent the spontaneous aggregation of CS at 43 °C. (B) Thermal CS (final concentration: 150 nM monomer) aggregation was monitored at 360 nm in a UV/vis spectrophotometer in the absence ( $\nabla$ ) and presence of 150 nM ( $\Delta$ ), 300 nM ( $\circ$ ), and 600 nM ( $\blacksquare$ ) Hsp20.2 monomer. (C) Influence of Hsp17.7 on the thermal aggregation of luciferase. Luciferase (final concentration: 150 nM) was diluted into a thermostated solution (43 °C) of 300 nM ( $\Delta$ ), 600 nM ( $\circ$ ), and 3  $\mu$ M ( $\blacksquare$ ) Hsp17.7 monomer.  $\nabla$  represent the spontaneous aggregation of luciferase at 43 °C. Legend continued on following page



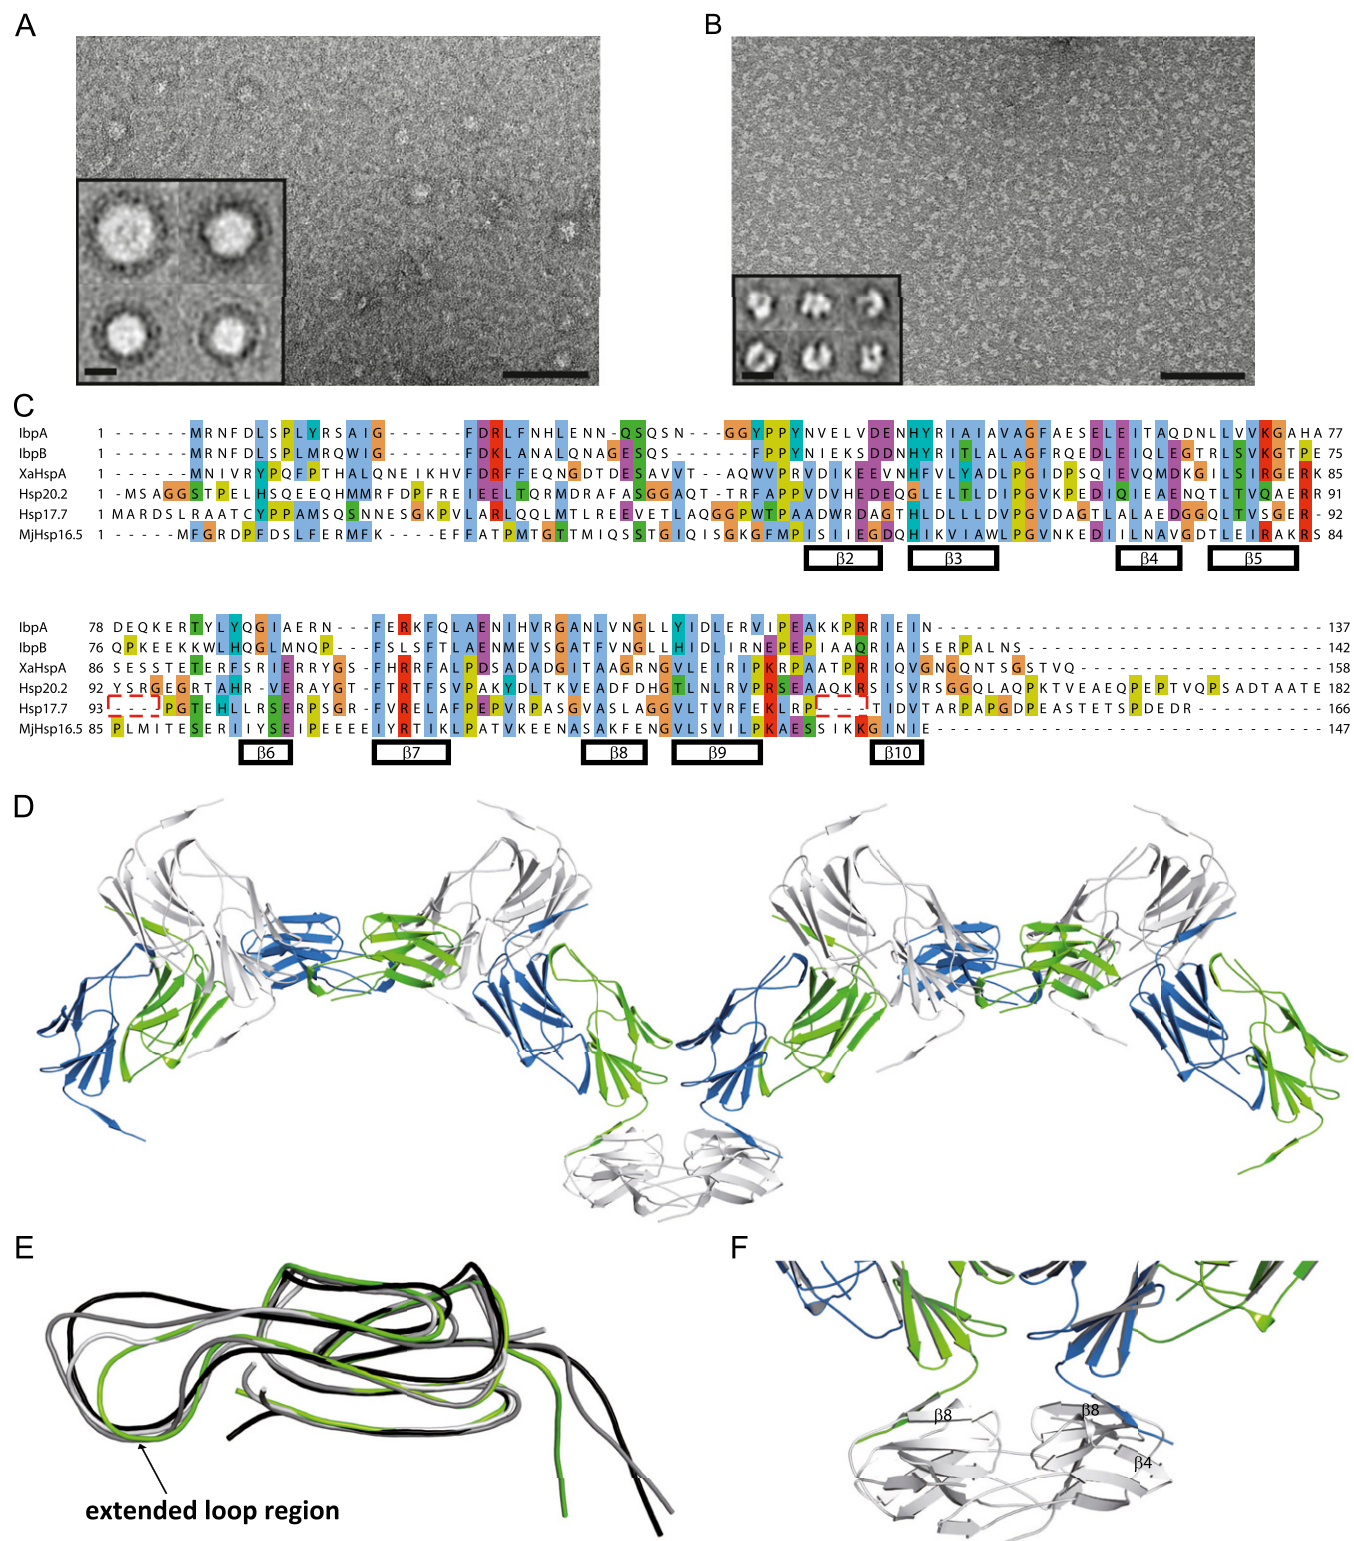

**Fig. 54.** Structure of Hsp17.7 and Hsp20.2. (*A* and *B*) Characteristic transmission electron microscopy micrographs of negatively stained Hsp20.2 (*A*) and Hsp17.7 (*B*) at 0.05 mg/mL protein in 1.5% (wt/vol) uranyl acetate. (Scale bar, 100 nm.) (*Insets*) Characteristic class averages of the oligomers or dimers, respectively. (Scale bar, 10 nm.) (*C*) Multiple sequence alignment of Hsp17.7, Hsp20.2, IbpA/B, MjHsp16.5, and XaHspA. The  $\beta$ -sheets formed in the Hsp17.7 crystal are indicated. Red boxes mark peculiar gaps in the Hsp17.7 sequence. (*D*) Crystal packing of Hsp17.7. The dimer building blocks are assembled in a helical, lined-up order owing to the trigonal space group. (*E*) Backbone superposition of one monomer of Hsp17.7 (green), XaHspA (light gray), MjHsp16.5 (dark gray), and TaHsp16.9 (black). The comparison of the superimposed backbones exhibits significant structural variations for the extended loop region. (*F*) Close up of the C-terminal extensions of Hsp17.7 monomers (blue and green, respectively) containing the conserved IXIV-motif, which adopts  $\beta$ -strand conformation ( $\beta$ 10 strand) by binding in a hydrophobic groove formed by the  $\beta$ 4 and  $\beta$ 8 strands of an adjacent monomer (light gray).



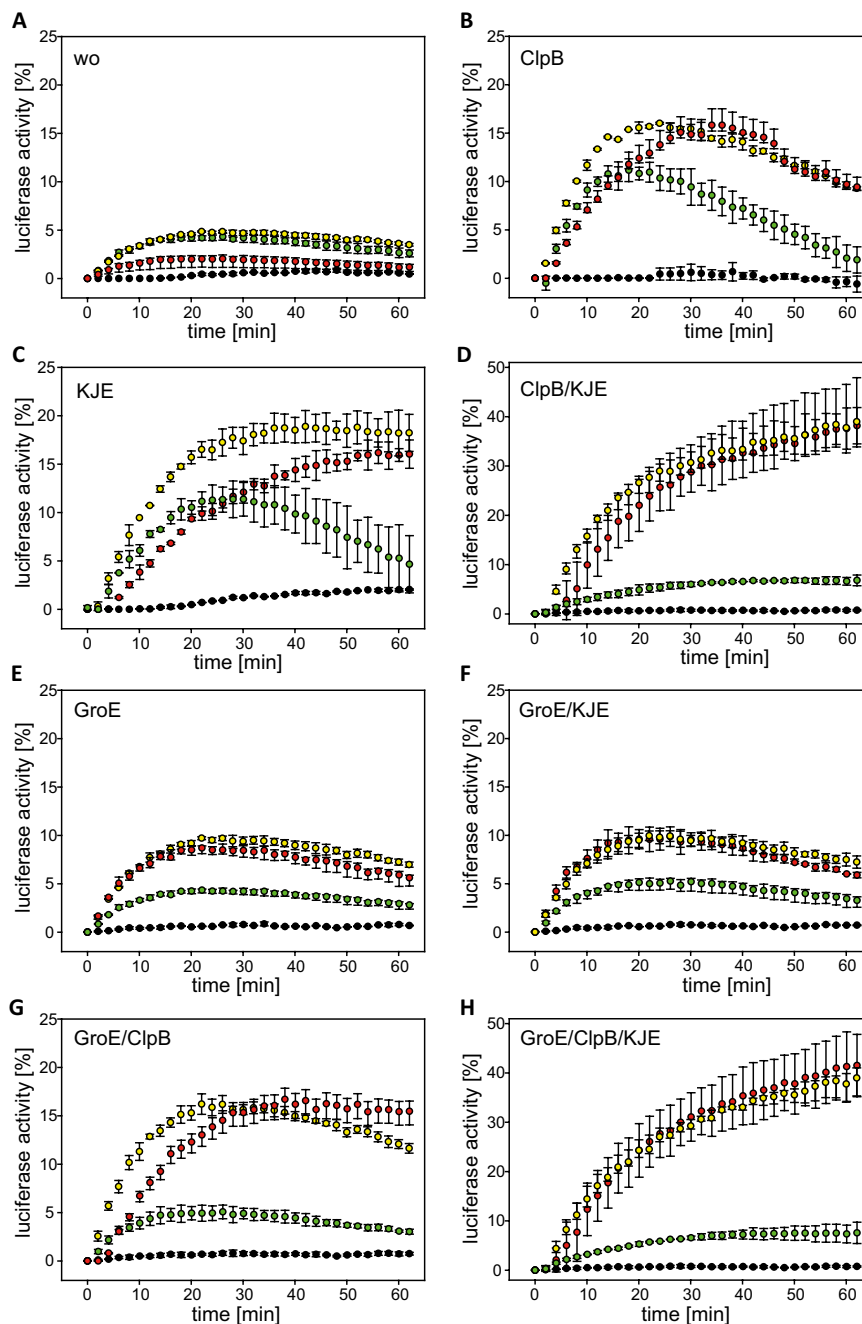

**Fig. S7.** Analysis of luciferase release from Hsp17.7 and Hsp20.2. Effects of Hsp17.7 and Hsp20.2 on the refolding efficiency of heat-denatured luciferase by the KJE, ClpB, and GroE chaperone machineries. Luciferase (80 nM) was incubated at 43 °C for 10 min in the absence (black) of sHsps or in the presence of 600 nM Hsp20.2 (red), 600 nM Hsp17.7 (green), or 600 nM of Hsp20.2 and Hsp17.7 (yellow). Luciferase activity was followed kinetically for 65 min. Assays were performed in triplicates; mean values and the respective SD are indicated. For normalization, the activity of 80 nM untreated luciferase was set to 100%. After complete inactivation, the samples were shifted to 25 °C, and subsequently different mixtures of chaperones were added. (A) Without addition of further chaperones. (B) Addition of ClpB (600 nM). (C) Addition of DnaK/DnaJ/GrpE (KJE, 0.6, 1.2, and 0.6  $\mu$ M). (D) Addition of ClpB (600 nM) and DnaK/DnaJ/GrpE (KJE, 0.6, 1.2, and 0.6  $\mu$ M). (E) Addition of GroE (600 nM GroEL and GroES). (F) Addition of GroE (600 nM GroEL and GroES) and DnaK/DnaJ/GrpE (KJE, 0.6, 1.2, and 0.6  $\mu$ M). (G) Addition of GroE (600 nM GroEL and GroES) and ClpB (600 nM). (H) Addition of GroE (600 nM GroEL and GroES), ClpB (600 nM), and DnaK/DnaJ/GrpE (KJE, 0.6, 1.2, and 0.6  $\mu$ M).



**Table S1. Data collection and refinement statistics**

| Parameter                                             | Dr_sHSP17.7*              |
|-------------------------------------------------------|---------------------------|
| <b>Crystal parameters</b>                             |                           |
| Space group                                           | P3 <sub>1</sub> 21        |
| Cell constants                                        | a, b = 51.3 Å, c = 80.4 Å |
| <b>Data collection</b>                                |                           |
| Rotating anode                                        | CuK <sub>α</sub>          |
| Wavelength (Å)                                        | 1.5418                    |
| Resolution range (Å) <sup>†</sup>                     | 40–2.4 (2.5–2.4)          |
| No. observations                                      | 87023                     |
| No. unique reflections <sup>‡</sup>                   | 5119                      |
| Completeness (%) <sup>†</sup>                         | 99.9 (100.0)              |
| R <sub>merge</sub> (%) <sup>†,§</sup>                 | 5.3 (36.9)                |
| I/σ (I) <sup>†</sup>                                  | 18.4 (5.3)                |
| <b>Refinement (REFMAC5)</b>                           |                           |
| Resolution range (Å)                                  | 15–2.4                    |
| No. reflections working set                           | 4539                      |
| No. reflections test set                              | 209                       |
| No. non hydrogen                                      | 757                       |
| No. of solvent water                                  | 79                        |
| R <sub>work</sub> /R <sub>free</sub> (%) <sup>¶</sup> | 19.7/25.3                 |
| rmsd bond lengths (Å)/(°) <sup>  </sup>               | 0.017/1.54                |
| Average B-factor (Å <sup>2</sup> )                    | 25.8                      |
| Ramachandran Plot (%) <sup>**</sup>                   | 96.0/4.0/0.0              |

\*Dataset has been collected on a single crystal.

<sup>†</sup>The values in parentheses of resolution range, completeness, R<sub>merge</sub>, and I/σ (I) correspond to the last resolution shell.

<sup>‡</sup>Friedel pairs were treated as different reflections.

<sup>§</sup>R<sub>merge</sub>(I) =  $\sum_{hkl} \sum_j |I(hkl)_j - \langle I(hkl) \rangle| / [\sum_{hkl} I(hkl)]$ , where I(hkl)<sub>j</sub> is the j<sup>th</sup> measurement of the intensity of reflection hkl and <I(hkl)> is the average intensity.

<sup>¶</sup>R =  $\sum_{hkl} (|F_{obs}| - |F_{calc}|) / \sum_{hkl} |F_{obs}|$ , where R<sub>free</sub> is calculated without a sigma cutoff for a randomly chosen 5% of reflections, which were not used for structure refinement, and R<sub>work</sub> is calculated for the remaining reflections.

<sup>||</sup>Deviations from ideal bond lengths/angles.

<sup>\*\*</sup>Number of residues in favored region/allowed region/outlier region.



Table S2. Cont.

| Accession   | Gene locus | Description                                                                     | 20    | 17/20 | Agg   | MM (kDa) | Calc. pI |
|-------------|------------|---------------------------------------------------------------------------------|-------|-------|-------|----------|----------|
| NP_294635.1 | DR_0911    | DNA-directed RNA polymerase subunit beta'                                       | 39.89 | 0.00  | 0.00  | 171.3    | 5.35     |
| NP_294694.1 | DR_0970    | Electron transfer flavoprotein subunit alpha                                    | 26.10 | 0.00  | 0.00  | 32.7     | 4.91     |
| NP_294030.1 | DR_0307    | Elongation factor G                                                             | 17.90 | 0.00  | 0.00  | 76.7     | 5.10     |
| NP_295312.1 | DR_1589    | Fructose-bisphosphate aldolase                                                  | 15.48 | 0.00  | 0.00  | 32.4     | 5.77     |
| NP_295651.1 | DR_1928    | Glycerol kinase                                                                 | 6.61  | 0.00  | 0.00  | 55.0     | 5.48     |
| NP_294922.1 | DR_1198    | GTP-binding elongation factor family protein TypA/BipA                          | 11.90 | 0.00  | 0.00  | 66.0     | 5.25     |
| NP_296029.1 | DR_2308    | GTP-binding protein EngA                                                        | 22.89 | 0.00  | 0.00  | 49.5     | 5.69     |
| NP_295263.1 | DR_1540    | Isocitrate dehydrogenase                                                        | 20.36 | 0.00  | 0.00  | 47.4     | 5.25     |
| NP_294806.1 | DR_1082    | Light-repressed protein A                                                       | 8.83  | 0.00  | 0.00  | 22.0     | 6.15     |
| NP_296313.1 | DR_2594    | Magnesium protoporphyrin chelatase                                              | 24.74 | 0.00  | 0.00  | 53.2     | 5.15     |
| NP_294048.1 | DR_0325    | Malate dehydrogenase                                                            | 12.05 | 0.00  | 0.00  | 35.1     | 5.24     |
| NP_285600.1 | DR_A0277   | Malate synthase                                                                 | 21.32 | 0.00  | 0.00  | 58.5     | 5.47     |
| NP_294284.1 | DR_0561    | Maltose ABC transporter periplasmic maltose-binding protein                     | 7.80  | 0.00  | 0.00  | 41.8     | 9.69     |
| NP_296227.1 | DR_2507    | Medium-chain fatty acid-CoA ligase                                              | 6.46  | 0.00  | 0.00  | 63.8     | 5.60     |
| NP_294674.1 | DR_0950    | NADH dehydrogenase II                                                           | 10.74 | 0.00  | 0.00  | 41.3     | 7.66     |
| NP_295691.1 | DR_1968    | Nitroreductase                                                                  | 7.55  | 0.00  | 0.00  | 23.8     | 6.11     |
| NP_295291.1 | DR_1568    | Peptide ABC transporter ATP-binding protein                                     | 14.57 | 0.00  | 0.00  | 42.0     | 6.86     |
| NP_296107.1 | DR_2386    | Phenylacetate-CoA oxygenase subunit PaaA                                        | 13.64 | 0.00  | 0.00  | 36.6     | 5.77     |
| NP_296105.1 | DR_2384    | Phenylacetic acid degradation protein PaaC                                      | 2.62  | 0.00  | 0.00  | 29.3     | 5.14     |
| NP_285481.1 | DR_A0157   | Phosphate ABC transporter periplasmic phosphate-binding protein                 | 8.03  | 0.00  | 0.00  | 42.0     | 9.82     |
| NP_294701.1 | DR_0977    | Phosphoenolpyruvate carboxykinase                                               | 8.03  | 0.00  | 0.00  | 53.3     | 5.44     |
| NP_294298.2 | DR_0575    | Preprotein translocase subunit SecA                                             | 22.38 | 0.00  | 0.00  | 97.2     | 5.19     |
| NP_296296.1 | DR_2576    | Putative manganese-dependent inorganic pyrophosphatase                          | 9.43  | 0.00  | 0.00  | 34.0     | 4.89     |
| NP_293979.1 | DR_0256    | Pyruvate dehydrogenase complex, dihydrolipoamide acetyltransferase E2 component | 10.21 | 0.00  | 0.00  | 63.6     | 5.05     |
| NP_296091.1 | DR_2370    | Pyruvate dehydrogenase complex, dihydrolipoamide dehydrogenase E3 component     | 20.10 | 0.00  | 0.00  | 49.2     | 5.90     |
| NP_294076.1 | DR_0353    | Ribonuclease                                                                    | 8.39  | 0.00  | 0.00  | 84.7     | 6.11     |
| NP_296095.1 | DR_2374    | Ribonucleoside-diphosphate reductase-like protein                               | 4.28  | 0.00  | 0.00  | 152.8    | 6.35     |
| NP_294476.1 | DR_0752    | Septum site-determining protein                                                 | 9.51  | 0.00  | 0.00  | 29.4     | 5.07     |
| NP_293764.1 | DR_0038    | Serine hydroxymethyltransferase                                                 | 10.24 | 0.00  | 0.00  | 47.4     | 6.81     |
| NP_295182.1 | DR_1459    | Serine protease                                                                 | 19.57 | 0.00  | 0.00  | 63.5     | 9.00     |
| NP_294972.1 | DR_1248    | Succinyl-CoA synthetase subunit alpha                                           | 8.95  | 0.00  | 0.00  | 30.9     | 5.68     |
| NP_294971.1 | DR_1247    | Succinyl-CoA synthetase subunit beta                                            | 6.16  | 0.00  | 0.00  | 41.7     | 5.48     |
| NP_294668.1 | DR_0944    | Thioredoxin                                                                     | 6.53  | 0.00  | 0.00  | 15.3     | 7.14     |
| NP_295977.1 | DR_2256    | Transketolase                                                                   | 6.71  | 0.00  | 0.00  | 71.5     | 5.96     |
| NP_295522.1 | DR_1799    | Translation initiation factor IF-2                                              | 22.77 | 0.00  | 0.00  | 64.0     | 4.98     |
| NP_295810.1 | DR_2087    | Translation initiation factor IF-3                                              | 7.96  | 0.00  | 0.00  | 23.6     | 9.14     |
| NP_296353.1 | DR_2634    | Tyrosyl-tRNA synthetase                                                         | 8.33  | 0.00  | 0.00  | 45.5     | 6.28     |
| NP_294423.1 | DR_0700    | V-type ATP synthase subunit A                                                   | 13.77 | 0.00  | 0.00  | 63.5     | 5.00     |
| NP_294424.1 | DR_0701    | V-type ATP synthase subunit B                                                   | 11.21 | 0.00  | 0.00  | 51.3     | 5.34     |
| NP_294425.1 | DR_0702    | V-type ATP synthase subunit D                                                   | 8.06  | 0.00  | 0.00  | 23.9     | 9.44     |
| NP_285329.1 | DR_A0005   | Zinc-containing alcohol dehydrogenase                                           | 27.64 | 0.00  | 0.00  | 42.0     | 6.52     |
| NP_294010.1 | DR_0287    | 2-Oxoglutarate dehydrogenase E1 component                                       | 0.00  | 0.00  | 4.68  | 105.9    | 5.81     |
| NP_294128.1 | DR_0405    | $\alpha$ -Dextran endo-1,6- $\alpha$ -glucosidase                               | 0.00  | 0.00  | 2.67  | 97.9     | 7.34     |
| NP_295911.1 | DR_2188    | Aminopeptidase                                                                  | 0.00  | 0.00  | 7.74  | 45.7     | 5.24     |
| NP_285582.1 | DR_A0259   | Catalase                                                                        | 0.00  | 0.00  | 5.68  | 84.0     | 6.92     |
| NP_296230.1 | DR_2510    | Enoyl-CoA hydratase                                                             | 0.00  | 0.00  | 5.17  | 28.3     | 5.67     |
| NP_295756.1 | DR_2033    | Glutamine synthase                                                              | 0.00  | 0.00  | 5.63  | 86.9     | 5.76     |
| NP_294102.1 | DR_0379    | Outer membrane protein                                                          | 0.00  | 0.00  | 67.02 | 90.2     | 6.15     |

A total of 118 proteins from *D. radiodurans* were identified either in triplicates of IP or native gels (Agg) (Fig. S5) as substrates of Hsp20.2. Seventeen proteins annotated as hypothetical have been excluded. For proteins that were identified by more than one experiment, the maximum score is indicated. Pink shading indicates the presence of the respective protein in the sample. Calc. pI, theoretical pI as calculated by Proteome Discoverer, MM, molecular mass. Accession numbers and locus tags refer to NCBI database (<http://www.ncbi.nlm.nih.gov>).
